# Supplementary material
Source: Springer Nature journal article supplement (https://www.springermedizin.de/resource/supplementary/12985_2009_826_MOESM4_ESM.pdf/9609276)

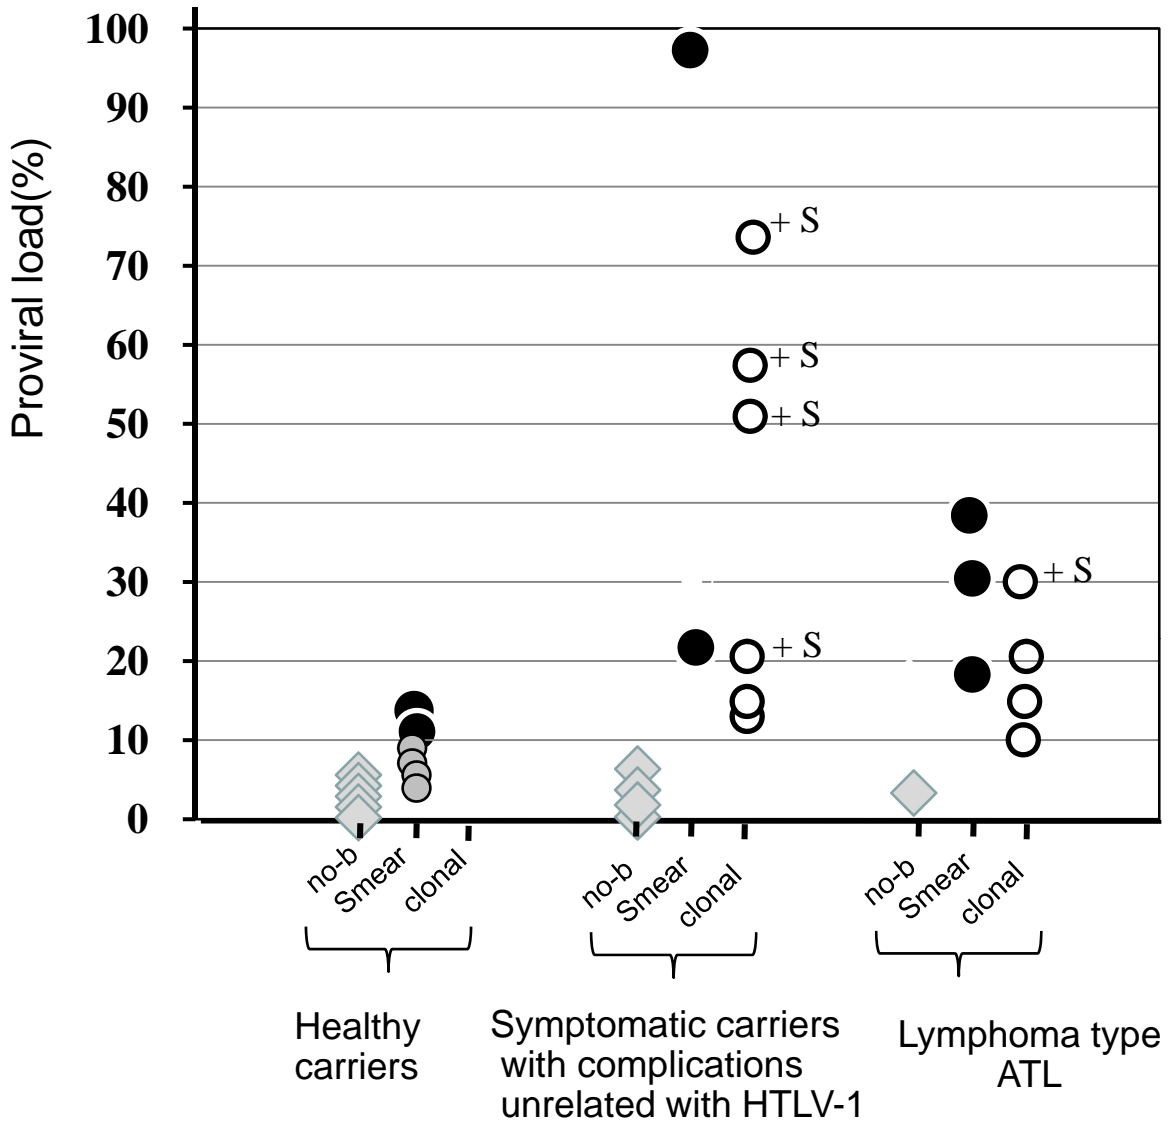

Supplement: MOESM4 [file 9609276]
